# Supplementary material
Source: PubMed Central journal article supplement (PMC8897514)
Supplement: NIHMS1775333-supplement-Supplementary_Material.pdf [file NIHMS1775333-supplement-Supplementary_Material.pdf]

## Decoding perineuronal net glycan sulfation patterns in the Alzheimer's disease brain

Aric F. Logsdon, PhD<sup>1,2#</sup>; Kendra L. Francis, MD<sup>3,4#</sup>; Nicole E. Richardson, PhD<sup>3</sup>; Shannon J. Hu, BSc<sup>3</sup>;  
Chelsea L. Faber, PhD<sup>3</sup>; Bao Anh Phan, BSc<sup>3</sup>; Vy Nguyen, BSc<sup>5</sup>; Naly Setthavongsack, BSc<sup>5</sup>; William A.  
Banks, MD<sup>1,2</sup>; Randy L. Woltjer, MD, PhD<sup>5</sup>; C. Dirk Keene, MD, PhD<sup>6</sup>; Caitlin S. Latimer, MD, PhD<sup>6</sup>; Michael W.  
Schwartz, MD<sup>3</sup>; Jarrad M. Scarlett, MD, PhD<sup>3,4†</sup>; Kimberly M. Alonge, PhD<sup>3†\*</sup>

#Equal first author contribution

†Equal senior author contribution

<sup>1</sup>Geriatric Research Education and Clinical Center (GRECC), Veterans Affairs Puget Sound Health Care System, University of Washington, Seattle, WA, USA.

<sup>2</sup>Division of Gerontology and Geriatric Medicine, Department of Medicine, University of Washington, Seattle, WA, USA.

<sup>3</sup>University of Washington Medicine Diabetes Institute, University of Washington, Seattle, WA, USA.

<sup>4</sup>Department of Pediatric Gastroenterology and Hepatology, Seattle Children's Hospital, Seattle, WA, USA.

<sup>5</sup>Department of Pathology, Oregon Health & Science University, Portland, OR, USA.

<sup>6</sup>Department of Laboratory Medicine and Pathology, University of Washington, Seattle, WA, USA.

## List of Materials:

**Figure S1.** Detection of CS isomers isolated from the MFG and CER by LC-MS/MS and MRM.

**Figure S2.** Total CS-GAG abundance is not altered between AD and non-demented control subjects.

**Figure S3.** MMSE cognitive scoring does not associate with changes in the relative abundance of MFG matrix  $\Delta A$ ,  $\Delta C$ , or  $\Delta D$ .

**Table S1.** Expanded characteristics of patient data.

**Table S2.** Relative percentages of CS isomers isolated from the cerebellar cortex.

**Table S3.** Intraregional differences in middle frontal gyrus CS-GAG sulfation patterns.

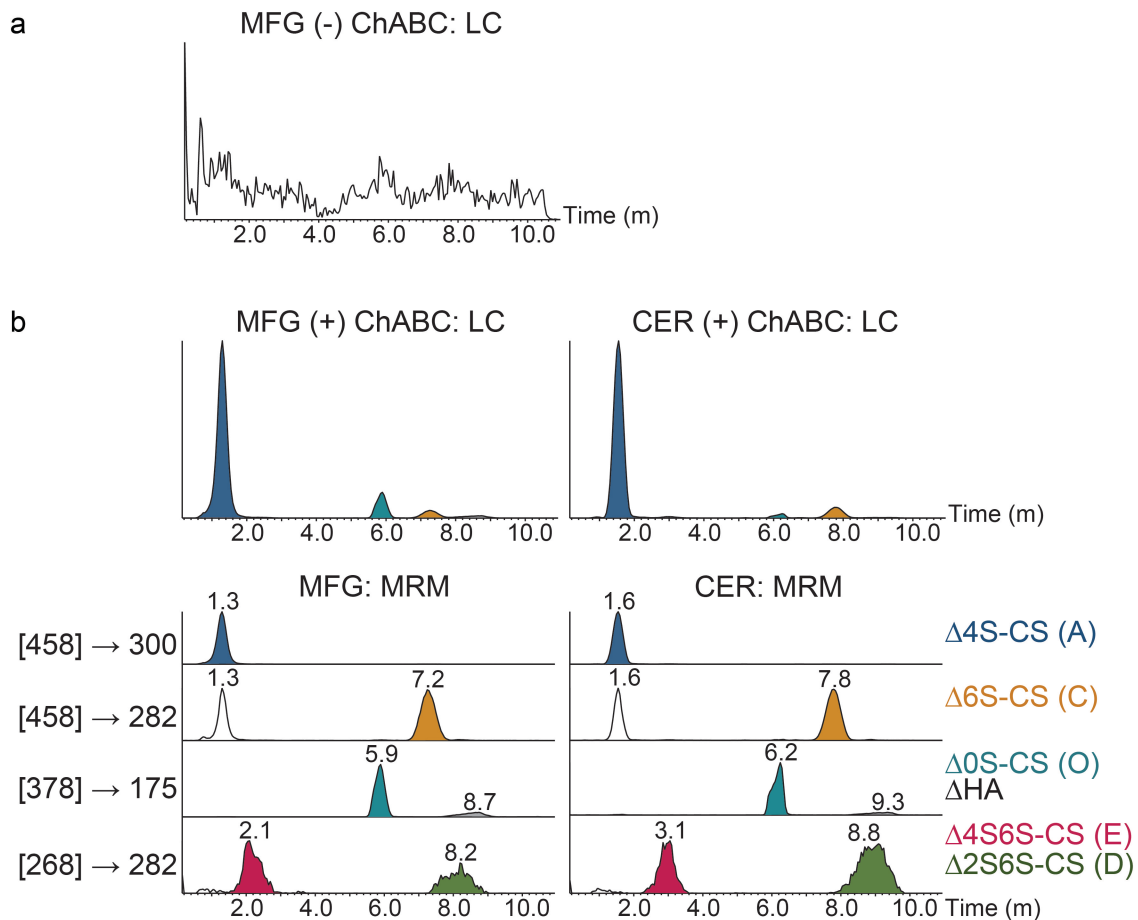

**Figure S1. Detection of CS isomers isolated from the MFG and CER by LC-MS/MS and MRM.** 30  $\mu\text{m}$ -thick formalin-fixed human middle frontal gyrus (MFG) and cerebellar cortex (CER) tissues were treated with **(a)** 50 mM ammonium bicarbonate (vehicle) or **(b)** 500 mU/mL of Chondroitinase ABC (ChABC) in 50 mM ammonium bicarbonate for 24 h at 37°C. Chromatogram of vehicle treatment alone **(a)** failed to release  $\Delta\text{CS}$  from the fixed tissue compared to ChABC treatment **(b)**. The extracted CS disaccharides are identified using the following MRM channels:  $\Delta\text{A}$  (4S),  $m/z$  458 > 300;  $\Delta\text{C}$  (6S),  $m/z$  458 > 282;  $\Delta\text{D}$  (2S6S) and  $\Delta\text{E}$  (4S6S),  $m/z$  268 > 282;  $\Delta\text{O}$  (0S),  $m/z$  378 > 175. The release of hyaluronan ( $\Delta\text{HA}$ ) by ChABC is also observed in the  $m/z$  378 > 175 channel. LC, liquid chromatography; MRM, multiple reaction monitoring.

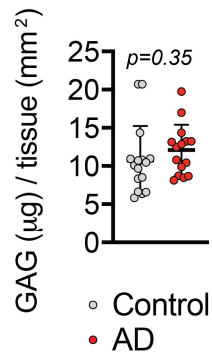

**Figure S2. Total CS-GAG abundance is not altered between AD and non-demented control subjects.** Total CS-GAGs extracted from ChABC-treated middle frontal gyrus tissue were quantified using cetylpyridinium chloride (CPC) analysis and normalized to total tissue area (mm<sup>2</sup>). (*n* = 15-16 subjects per group; mean ± SD). Data were analyzed using Student's *t*-test (unpaired, two-sided).

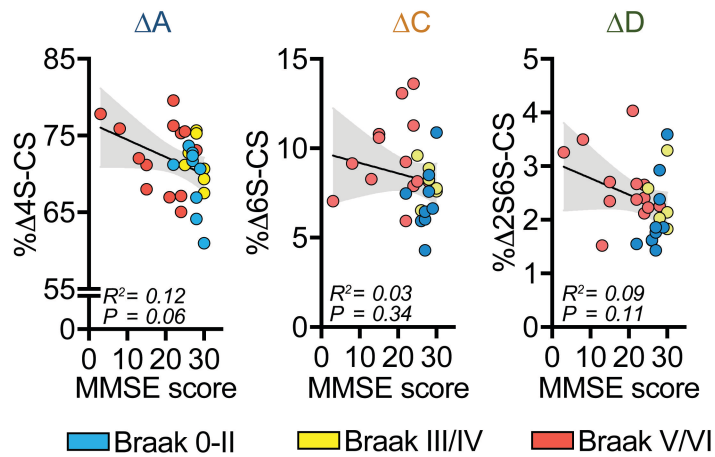

**Figure S3. MMSE cognitive scoring does not associate with changes in the relative abundance of MFG matrix  $\Delta A$ ,  $\Delta C$ , or  $\Delta D$ .** No significant association was observed between MMSE cognitive scoring and changes in the relative abundance of  $\Delta A$ ,  $\Delta C$ , or  $\Delta D$  isolated from the middle frontal gyrus (MFG). (n = 29 subjects). Data were analyzed using a linear regression with the 95% confidence bands shown in gray. MMSE, Mini-Mental State Exam; CS, chondroitin sulfate.

**Table S1.** Expanded characteristics of patient data.

|                                  | Age (years) | Sex (M,F) | PMI (hours) | Braak Stage | CERAD | MMSE Score | Year Collected | Study | Cohort Status   |
|----------------------------------|-------------|-----------|-------------|-------------|-------|------------|----------------|-------|-----------------|
| <b>Non-demented Individuals</b>  |             |           |             |             |       |            |                |       |                 |
| ND-1                             | 70          | F         | 7.0         | 0           | 0     | 27         | 2017           | ACT   | Included        |
| ND-2                             | 81          | M         | 4.5         | I           | 0     | 22         | 2002           | ACT   | Included        |
| ND-3                             | 89          | M         | 5.0         | I           | 0     | 28         | 2013           | ACT   | Included        |
| ND-4                             | 79          | F         | 2.1         | II          | 0     | 26         | 2006           | ACT   | Included        |
| ND-5                             | 92          | F         | 5.2         | II          | 0     | 30         | 2007           | ACT   | Included        |
| ND-6                             | 86          | M         | 5.7         | II          | 0     | 27         | 2007           | ACT   | Included        |
| ND-7                             | 84          | M         | 4.5         | II          | 0     | 28         | 2013           | ACT   | Included        |
| ND-8                             | 88          | F         | 3.2         | II          | 0     | 27         | 2014           | ACT   | Included        |
| ND-9                             | 84          | M         | 3.9         | II          | 0     | 29         | 2016           | ACT   | Included        |
| ND-10                            | 77          | F         | 6.0         | III         | 0     | 30         | 2006           | ADRC  | Included        |
| ND-11                            | 92          | F         | 6.9         | III         | 0     | 30         | 2008           | ACT   | Included        |
| ND-12                            | 88          | F         | 3.5         | III         | 0     | 28         | 2009           | ACT   | Included        |
| ND-13                            | 91          | M         | 5.0         | III         | 0     | 28         | 2011           | ACT   | Included        |
| ND-14                            | 86          | M         | 3.3         | III         | 0     | 26         | 2013           | ACT   | Included        |
| ND-15                            | 87          | M         | 3.7         | III         | 0     | 25         | 2014           | ACT   | Included        |
| ND-16                            | 90          | F         | 4.5         | III         | 0     | 30         | 2015           | ACT   | Included        |
| <b>Demented (AD) Individuals</b> |             |           |             |             |       |            |                |       |                 |
| D-1                              | 81          | M         | 5.0         | V           | 3     | n/a        | 2003           | ADRC  | Included        |
| D-2                              | 86          | M         | 2.7         | V           | 3     | 24         | 2010           | ADRC  | Included        |
| D-3                              | 90          | F         | 3.9         | V           | 3     | 22         | 2011           | ACT   | Included        |
| D-4                              | 85          | M         | 4.0         | V           | 3     | 25         | 2013           | ACT   | Included        |
| D-5                              | 89          | M         | 80.75       | V           | 3     | n/a        | 2010           | ADRC  | <i>Excluded</i> |
| D-6                              | 91          | M         | 47.3        | VI          | 3     | n/a        | 2006           | ADRC  | Included        |
| D-7                              | 89          | M         | 5.5         | VI          | 3     | 24         | 2007           | SLS   | Included        |
| D-8                              | 80          | F         | 7.9         | VI          | 3     | 24         | 2008           | ADRC  | Included        |
| D-9                              | 91          | M         | 5.8         | VI          | 3     | 15         | 2008           | ADRC  | Included        |
| D-10                             | 92          | F         | 3.2         | VI          | 3     | 21         | 2011           | ACT   | Included        |
| D-11                             | 86          | M         | 4.3         | VI          | 3     | 28         | 2012           | ACT   | Included        |
| D-12                             | 88          | F         | 3.3         | VI          | 3     | 15         | 2012           | ACT   | Included        |
| D-13                             | 88          | F         | 6.0         | VI          | 3     | 22         | 2014           | ACT   | Included        |
| D-14                             | 70          | F         | 5.0         | VI          | 3     | 3          | 2015           | ADRC  | Included        |
| D-15                             | 85          | M         | 3.5         | VI          | 3     | 13         | 2016           | ADRC  | Included        |
| D-16                             | 77          | F         | 3.3         | VI          | 3     | 8          | 2018           | ADRC  | Included        |

Abbreviations: AD, Alzheimer's disease; ND, non-demented; D, demented; PMI, postmortem interval; MMSE, Mini-Mental State Examination; M, male; F, female; n/a, not available; ADRC, UW Alzheimer's Disease Research Center; ACT, Adult Changes in Thought Study; SLS, Seattle Longitudinal Study.

**Table S2.** Relative percentages of CS isomers from the cerebellar cortex.

|                         | Non-demented (n=16) | Demented (AD) (n=15) | Difference of means | 95% CI of difference | $P_{adj}$ |
|-------------------------|---------------------|----------------------|---------------------|----------------------|-----------|
| %CS (SD)                |                     |                      |                     |                      |           |
| $\Delta A$ (4S)         | 56.24 (5.32)        | 58.79 (6.52)         | 2.55                | -3.38 to 8.47        | 0.76      |
| $\Delta C$ (6S)         | 22.03 (3.40)        | 21.86 (5.78)         | -0.17               | -4.99 to 4.65        | >0.99     |
| $\Delta E$ (4S6S)       | 3.29 (0.47)         | 3.60 (1.00)          | 0.31                | -0.50 to 1.11        | 0.82      |
| $\Delta D$ (2S6S)       | 8.32 (2.16)         | 6.87 (1.62)          | -1.44               | -3.33 to 0.44        | 0.20      |
| $\Delta A$ (4S)         | 56.24 (5.32)        | 58.79 (6.52)         | 2.55                | -3.38 to 8.47        | 0.76      |
| $\Delta O$ (0S)         | 10.11 (2.94)        | 8.87 (2.63)          | -1.24               | -3.99 to 1.51        | 0.72      |
| Avg # S Per $\Delta CS$ | 1.02 (0.04)         | 1.02 (0.03)          | <0.00               | -0.02 to 0.03        | 0.93      |

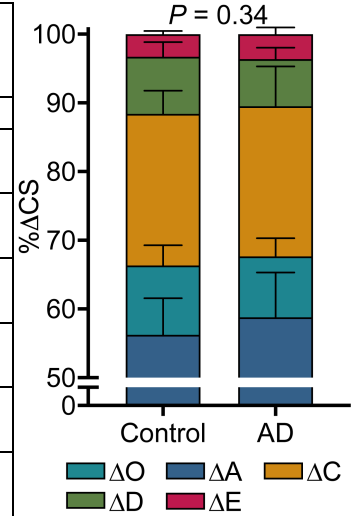

Abbreviations: AD, Alzheimer's disease; SD, standard deviation; CS, chondroitin sulfate. Stats: mixed-effects, repeated measures two-way ANOVA with matched CS isomers and Šidák's multiple comparisons. Stacked bars are represented with SD.

**Table S3.** Intraregional differences in middle frontal gyrus CS-GAG sulfation patterns.

|          | $\Delta O$ (0S) | $\Delta A$ (4S) | $\Delta C$ (6S) | $\Delta D$ (2S6S) | $\Delta E$ (4S6S) |
|----------|-----------------|-----------------|-----------------|-------------------|-------------------|
| MFG: A01 | $10.1 \pm 0.2$  | $79.1 \pm 0.3$  | $7.3 \pm 0.1$   | $2.3 \pm <0.1$    | $1.2 \pm 0.2$     |
| MFG: A14 | $10.8 \pm 0.1$  | $78.9 \pm 0.2$  | $7.2 \pm <0.1$  | $2.1 \pm <0.1$    | $1.1 \pm 0.2$     |

*Data are relative mean percentage  $\pm$  SD. Samples were run in technical triplicate. MFG, middle frontal gyrus. A01 and A14, two separate samples from the same MFG region of the same patient.*
